# Supplementary material for: Electroreduction of nitrite on gold electrode modified with Cu-containing nitrite reductase model complex
Source: Royal Society of Chemistry journal article supplement (doi:10.1039/b507932b), 2005-01-01

**Electronic supplementary information**

**Figure S1** S 2p X-ray photoelectron spectra of **2** (A) and CuMe<sub>2</sub>bpaEt (C), and Cu 2p<sub>3/2</sub> X-ray photoelectron spectra of **2** (B) and CuMe<sub>2</sub>bpaEt (D).

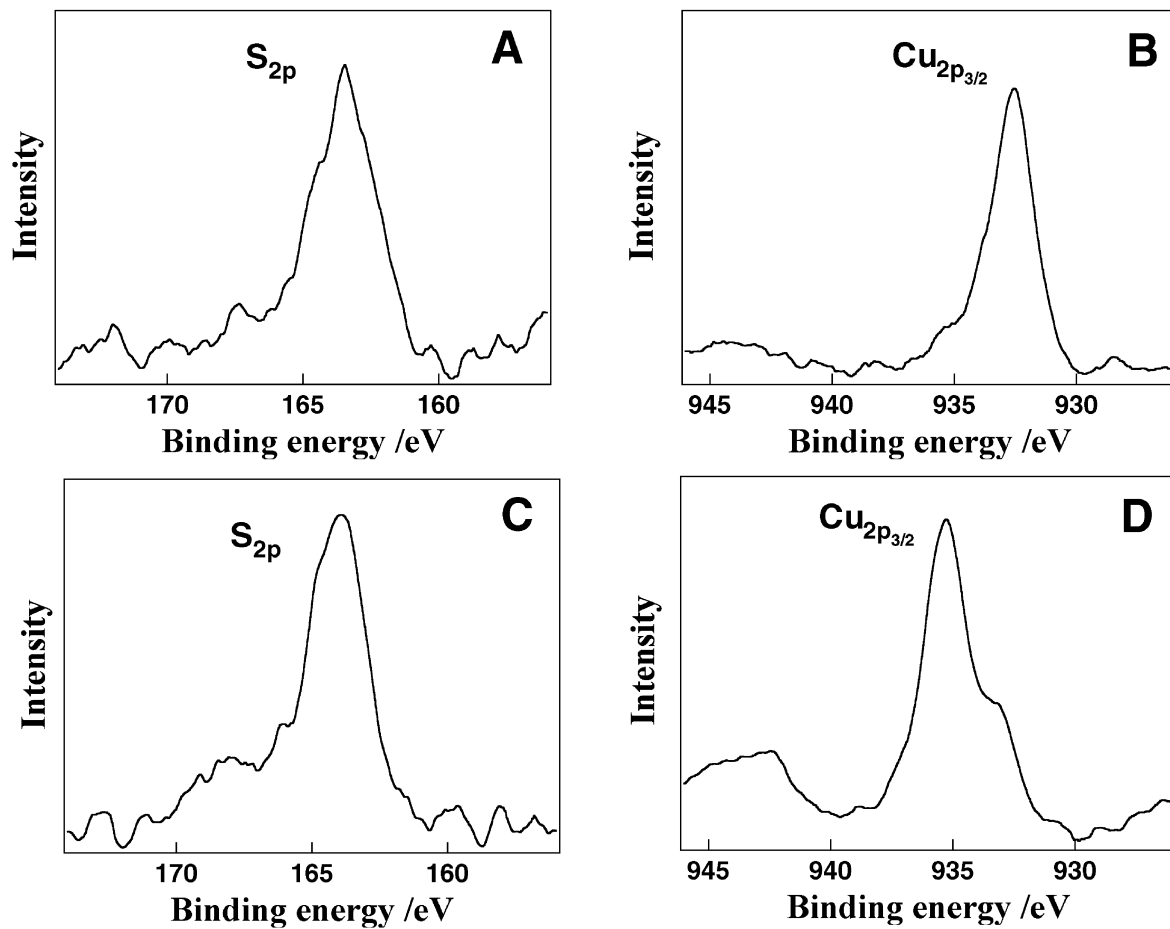

Supplement: b507932b.pdf [file b507932b.pdf]
